# Supplementary material for: Time-dependent changes in the growth of ultrathin ionic liquid films on Ag(111)
Source: Royal Society of Chemistry journal article supplement (doi:10.1039/c8cp01411f), 2018-01-01
Supplement: c8cp01411f1.pdf [file c8cp01411f1.pdf]

## Supporting information

Matthias Lexow<sup>ORCID: [0000-0002-1441-2909](https://orcid.org/0000-0002-1441-2909)</sup>, Timo Talwar, Bettina S. J. Heller<sup>ORCID: [0000-0001-9877-1310](https://orcid.org/0000-0001-9877-1310)</sup>, Benjamin May<sup>ORCID: [0000-0003-1886-9372](https://orcid.org/0000-0003-1886-9372)</sup>, Radha G. Bhui<sup>ORCID: [0000-0001-5914-1615](https://orcid.org/0000-0001-5914-1615)</sup>, Florian Maier<sup>ORCID: [0000-0001-9725-8961](https://orcid.org/0000-0001-9725-8961)</sup>, Hans-Peter Steinrück<sup>ORCID: [0000-0003-1347-8962](https://orcid.org/0000-0003-1347-8962)</sup>

Lehrstuhl für Physikalische Chemie 2,  
Friedrich-Alexander-Universität Erlangen-Nürnberg, Egerlandstr. 3,  
91058 Erlangen, Germany

### Background subtraction in the N 1s region:

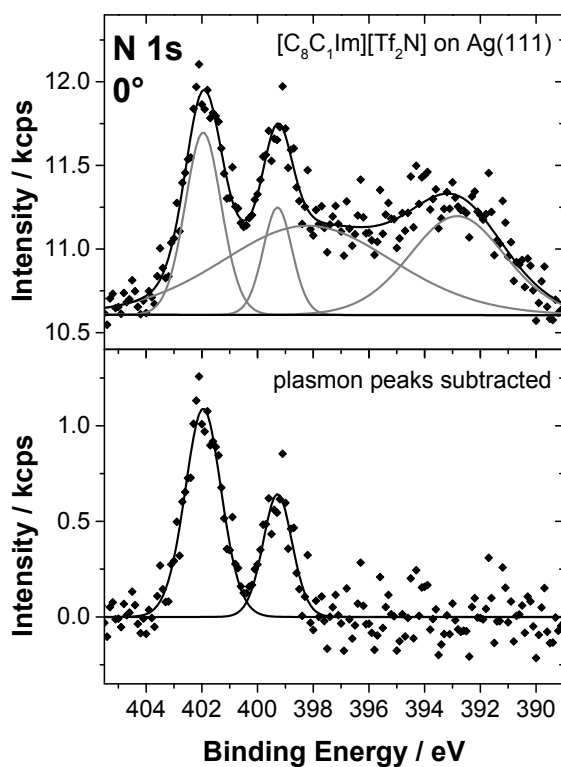

**Figure S1:** N 1s signal in 0° emission of 2.8 nm of  $[\text{C}_8\text{C}_1\text{Im}][\text{Tf}_2\text{N}]$  on Ag(111). The peak at higher BE corresponds to the two N atoms in the cationic imidazolium ring and the peak at lower BE to the single N atom in the anion. The peaks overlap strongly with satellites of the Ag 3d line of the substrate. A least-squares fit of the N 1s peaks together with the satellites was used to deal with the complicated background. The lower spectrum shows the IL related N 1s spectrum after subtraction of the substrate contributions of the spectra.

## Composition of IL films on Ag(111) from PVD compared to macroscopic films

**Table S1:** Film composition as measured by XPS of a 3.7 nm thin film of [C<sub>1</sub>C<sub>1</sub>Im][Tf<sub>2</sub>N] on Ag(111) (left) and a macroscopic droplet (right) at RT in 0° emission. Nominal ratios are given in brackets.

| component  | C <sub>het</sub> 1s | C <sub>an</sub> 1s | N <sub>cat</sub> 1s | N <sub>an</sub> 1s | O 1s             | F 1s             | S 2p             |
|------------|---------------------|--------------------|---------------------|--------------------|------------------|------------------|------------------|
| atom ratio | 5.3 / 4.9<br>(5)    | 2.0 / 2.1<br>(2)   | 1.8 / 2.1<br>(2)    | 1.2 / 1.1<br>(1)   | 4.1 / 3.9<br>(4) | 5.9 / 5.9<br>(6) | 1.8 / 2.0<br>(2) |
| FWHM / eV  | 1.9 / 1.7           | 1.5 / 1.3          | 1.4 / 1.4           | 2.0 / 1.4          | 1.7 / 1.5        | 2.0 / 1.9        | 1.8 / 1.4        |
| BE / eV    | 287.0 /<br>287.0    | 293.1 /<br>293.0   | 402.2 /<br>402.3    | 399.6 /<br>399.6   | 532.8 /<br>532.8 | 689.0 /<br>688.9 | 169.0 /<br>169.1 |

**Table S2:** Film composition as measured by XPS of a 2.9 nm thin film of [C<sub>8</sub>C<sub>1</sub>Im][Tf<sub>2</sub>N] on Ag(111) (left) and a macroscopic droplet (right) at RT in 0° emission. Nominal ratios are given in brackets.

| component  | C <sub>alk</sub> 1s | C <sub>het</sub> 1s | C <sub>an</sub> 1s | N <sub>cat</sub> 1s | N <sub>an</sub> 1s | O 1s             | F 1s             | S 2p             |
|------------|---------------------|---------------------|--------------------|---------------------|--------------------|------------------|------------------|------------------|
| atom ratio | 6.8 / 7.3<br>(7)    | 4.9 / 5.1<br>(5)    | 1.9 / 2.1<br>(2)   | 2.1 / 2.0<br>(2)    | 1.1 / 1.0<br>(1)   | 4.0 / 3.9<br>(4) | 6.4 / 5.7<br>(6) | 1.8 / 1.9<br>(2) |
| FWHM / eV  | 1.5 / 1.4           | 1.7 / 1.6           | 1.4 / 1.4          | 1.6 / 1.4           | 1.4 / 1.5          | 1.5 / 1.5        | 1.9 / 1.9        | 1.4 / 1.3        |
| BE / eV    | 285.0 /<br>285.0    | 286.9 /<br>286.9    | 292.9 /<br>293.0   | 402.1 /<br>402.2    | 399.5 /<br>399.6   | 532.7 /<br>532.8 | 688.9 /<br>688.9 | 169.0 /<br>169.1 |

## RT LEED study for sub-ML coverages of $[C_1C_1Im][Tf_2N]$ on Ag(111):

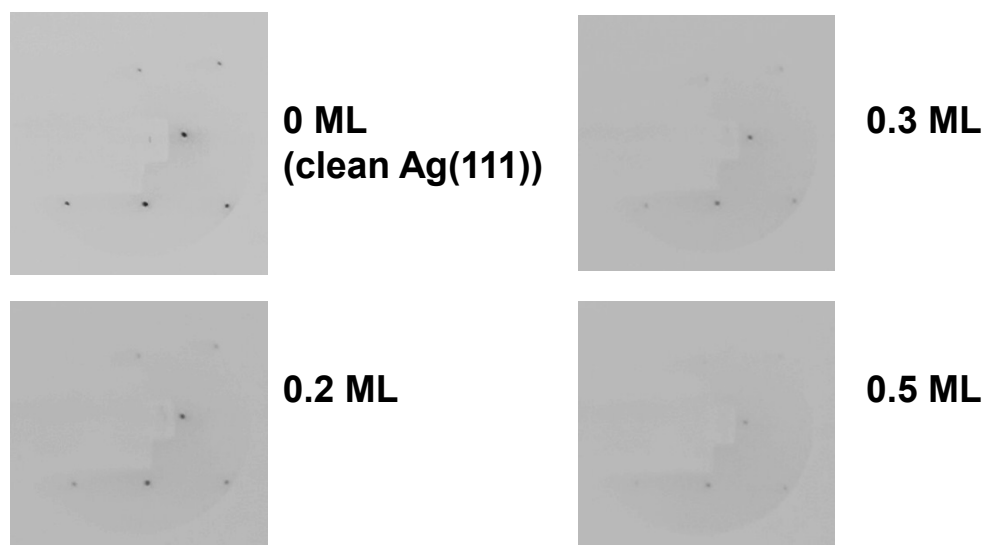

Figure S2: LEED series for sub-ML coverages of  $[C_1C_1Im][Tf_2N]$  on Ag(111) at 300 K. The weak feature on the left side of the pictures is the shadow of the sample holder.

## Reference experiment with low X-ray exposure after deposition of $[C_1C_1Im][Tf_2N]$ on Ag(111):

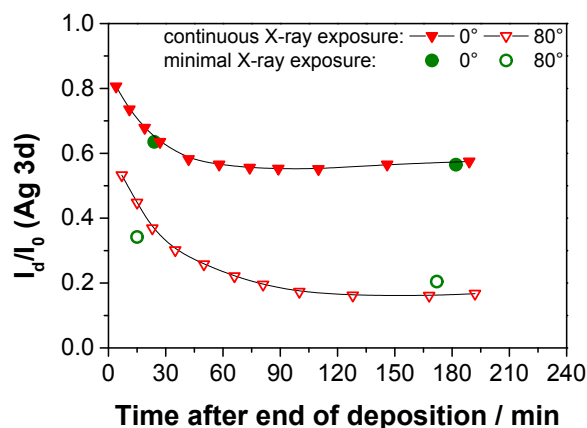

Figure S3: Time-dependent ARXPS of the IL film after ending the deposition of  $[C_1C_1Im][Tf_2N]$  on Ag(111) at RT. The red triangles represent the data of Figure 8a. The green circles show data for a reference experiment with much lower exposure to X-rays, in which the sample was moved out of the X-ray beam between the scans in order to reduce the exposure for the measurements at  $\sim 180$  min by more than a factor of 4.
